# Supplementary material
Source: HighWire-hosted journal article supplement (https://www.ajevonline.org/content/suppl/2019/06/07/ajev.2019.18054)
Supplement: Supplemental_Table_3.pdf [file Supplemental_Table_3.pdf]

**Supplemental Data for:**

Migliaro D, De Lorenzis G, Di Lorenzo GS, De Nardi B, Gardiman M, Failla O, Brancadoro L and Crespan M. 2019.

Grapevine non-*vinifera* genetic diversity assessed by simple sequence repeat markers as a starting point for new rootstock breeding programs. Am J Enol Vitic 70:390-397. doi: 10.5344/ajev.2019.18054.

| Supplemental Table 3 Allelic profiles at 17 simple sequence repeat (SSR) loci of 232 grapevine rootstock genotypes. Original questionable accession names are converted to “no name.” Suggested names for uncertain varieties are in bold. |                                              |      |     |       |     |       |     |        |     |        |     |        |     |         |     |         |     |         |     |         |     |        |     |        |     |        |     |         |     |         |     |        |     |          |     |
|--------------------------------------------------------------------------------------------------------------------------------------------------------------------------------------------------------------------------------------------|----------------------------------------------|------|-----|-------|-----|-------|-----|--------|-----|--------|-----|--------|-----|---------|-----|---------|-----|---------|-----|---------|-----|--------|-----|--------|-----|--------|-----|---------|-----|---------|-----|--------|-----|----------|-----|
| SSR<br>profile<br>ID                                                                                                                                                                                                                       | Variety                                      | VVS2 |     | VVMD5 |     | VVMD7 |     | VVMD25 |     | VVMD27 |     | VVMD28 |     | VrZAG62 |     | VrZAG64 |     | VrZAG79 |     | VrZAG83 |     | VChr3a |     | VChr4a |     | VChr7b |     | VChr10b |     | VChr19a |     | VMC6E1 |     | VMCNG4b9 |     |
| 1                                                                                                                                                                                                                                          | 101.14 Millardet et de Grasset               | 133  | 143 | 256   | 266 | 243   | 251 | 241    | 243 | 197    | 207 | 245    | 253 | 172     | 189 | 137     | 150 | 254     | 256 | 187     | 187 | 181    | 251 | 176    | 183 | 179    | 195 | 126     | 138 | 129     | 133 | 131    | 151 | 151      | 164 |
| 2                                                                                                                                                                                                                                          | 1045 Paulsen                                 | 137  | 149 | 226   | 236 | 233   | 257 | 241    | 251 | 191    | 205 | 245    | 255 | 195     | 213 | 137     | 137 | 250     | 258 | 173     | 187 | 178    | 243 | 183    | 194 | 175    | 187 | 117     | 129 | 126     | 149 | 129    | 133 | 156      | 163 |
| 3                                                                                                                                                                                                                                          | 106.8 Millardet et de Grasset                | 139  | 143 | 234   | 266 | 243   | 253 | 243    | 253 | 183    | 209 | 243    | 247 | 189     | 193 | 158     | 160 | 242     | 254 | 184     | 184 | 181    | 196 | 194    | 198 | 175    | 195 | 135     | 135 | 129     | 136 | 133    | 159 | 152      | 156 |
| 4                                                                                                                                                                                                                                          | 110 Richter                                  | 137  | 143 | 234   | 268 | 231   | 257 | 241    | 267 | 189    | 205 | 223    | 237 | 195     | 213 | 137     | 141 | 242     | 258 | 173     | 218 | 184    | 190 | 180    | 183 | 187    | 191 | 114     | 129 | 129     | 165 | 129    | 133 | 160      | 172 |
| 5                                                                                                                                                                                                                                          | 1103 Paulsen                                 | 137  | 147 | 236   | 236 | 233   | 257 | 241    | 254 | 203    | 207 | 245    | 255 | 195     | 213 | 137     | 137 | 250     | 262 | 165     | 187 | 178    | 243 | 176    | 194 | 183    | 187 | 120     | 129 | 129     | 146 | 129    | 133 | 160      | 163 |
| 6                                                                                                                                                                                                                                          | 1202 Couderc                                 | 137  | 151 | 226   | 252 | 249   | 249 | 241    | 267 | 179    | 207 | 239    | 247 | 187     | 201 | 139     | 158 | 254     | 260 | 184     | 201 | 209    | 287 | 183    | 198 | 171    | 179 | 126     | 129 | 129     | 142 | 133    | 143 | 158      | 172 |
| 7                                                                                                                                                                                                                                          | 13-5 Evex                                    | 135  | 149 | 226   | 264 | 231   | 233 | 251    | 253 | 203    | 209 | 243    | 255 | 207     | 213 | 137     | 150 | 250     | 254 | 165     | 189 | 187    | 243 | 176    | 194 | 175    | 179 | 117     | 120 | 136     | 149 | 125    | 129 | 163      | 166 |
| 8                                                                                                                                                                                                                                          | 140 Ruggeri                                  | 137  | 143 | 246   | 268 | 231   | 257 | 241    | 267 | 189    | 205 | 237    | 245 | 195     | 213 | 137     | 141 | 242     | 258 | 187     | 189 | 178    | 190 | 183    | 194 | 171    | 187 | 126     | 141 | 126     | 165 | 129    | 133 | 160      | 172 |
| 9                                                                                                                                                                                                                                          | 1447 Paulsen                                 | 137  | 147 | 226   | 268 | 233   | 261 | 241    | 254 | 203    | 207 | 223    | 255 | 195     | 213 | 137     | 137 | 250     | 262 | 165     | 218 | 184    | 243 | 176    | 194 | 183    | 187 | 117     | 141 | 129     | 146 | 129    | 133 | 160      | 166 |
| 10                                                                                                                                                                                                                                         | 161.49 Couderc                               | 137  | 141 | 228   | 266 | 231   | 251 | 241    | 274 | 187    | 211 | 219    | 245 | 191     | 195 | 150     | 158 | 254     | 258 | 158     | 189 | 175    | 187 | 180    | 183 | 179    | 195 | 117     | 138 | 129     | 136 | 127    | 157 | 161      | 168 |
| 11                                                                                                                                                                                                                                         | 1613 Couderc                                 | 129  | 139 | 238   | 268 | 243   | 251 | 247    | 253 | 177    | 209 | 239    | 251 | 187     | 189 | 137     | 137 | 256     | 266 | 160     | 187 | 181    | 199 | 183    | 198 | 183    | 195 | 120     | 138 | 136     | 149 | 133    | 151 | 158      | 161 |
| 12                                                                                                                                                                                                                                         | 196-17 Castel                                | 133  | 145 | 266   | 266 | 249   | 265 | 243    | 245 | 189    | 207 | 219    | 247 | 187     | 199 | 139     | 158 | 254     | 260 | 184     | 201 | 175    | 175 | 183    | 206 | 179    | 179 | 126     | 138 | 129     | 136 | 157    | 165 | 152      | 172 |
| 13                                                                                                                                                                                                                                         | 216-3 Castel                                 | 137  | 141 | 236   | 268 | 251   | 261 | 241    | 243 | 207    | 211 | 223    | 245 | 189     | 195 | 137     | 150 | 254     | 262 | 187     | 187 | 184    | 293 | 176    | 183 | 187    | 195 | 138     | 141 | 129     | 129 | 133    | 135 | 156      | 161 |
| 14                                                                                                                                                                                                                                         | 31 Richter                                   | 139  | 143 | 258   | 264 | 251   | 251 | 241    | 259 | 189    | 189 | 223    | 245 | 183     | 189 | 137     | 139 | 256     | 258 | 187     | 218 | 178    | 181 | 176    | 194 | 183    | 187 | 126     | 138 | 126     | 133 | 133    | 171 | 161      | 162 |
| 15                                                                                                                                                                                                                                         | 3306 Couderc                                 | 133  | 159 | 246   | 264 | 245   | 259 | 241    | 243 | 186    | 215 | 239    | 249 | 179     | 189 | 141     | 154 | 254     | 254 | 187     | 187 | 175    | 254 | 183    | 183 | 179    | 187 | 138     | 138 | 126     | 129 | 133    | 133 | 152      | 164 |
| 16                                                                                                                                                                                                                                         | 3309 Couderc                                 | 123  | 161 | 252   | 264 | 245   | 259 | 241    | 243 | 185    | 211 | 243    | 249 | 179     | 189 | 154     | 154 | 254     | 256 | 187     | 187 | 181    | 254 | 176    | 183 | 179    | 187 | 135     | 138 | 126     | 133 | 133    | 135 | 152      | 162 |
| 17                                                                                                                                                                                                                                         | 333 Ecole de Montpellier or Tisserand        | 139  | 149 | 220   | 232 | 231   | 239 | 243    | 255 | 189    | 191 | 239    | 239 | 193     | 217 | 158     | 158 | 246     | 258 | 189     | 201 | 181    | 187 | 180    | 183 | 183    | 187 | 117     | 129 | 133     | 139 | 127    | 141 | 158      | 168 |
| 18                                                                                                                                                                                                                                         | 34 Ecole de Montpellier                      | 135  | 143 | 240   | 264 | 231   | 251 | 253    | 271 | 189    | 209 | 243    | 247 | 190     | 207 | 141     | 150 | 252     | 254 | 184     | 189 | 181    | 187 | 176    | 194 | 179    | 199 | 117     | 138 | 129     | 136 | 125    | 133 | 163      | 164 |
| 19                                                                                                                                                                                                                                         | 41 B Millardet et de Grasset                 | 135  | 143 | 226   | 228 | 231   | 239 | 259    | 260 | 189    | 191 | 245    | 271 | 193     | 219 | 137     | 152 | 254     | 258 | 195     | 201 | 184    | 187 | 194    | 198 | 183    | 187 | 117     | 132 | 123     | 136 | 129    | 141 | 162      | 164 |
| 20                                                                                                                                                                                                                                         | 420 A Millardet et de Grasset                | 127  | 137 | 238   | 264 | 231   | 263 | 243    | 275 | 193    | 217 | 247    | 249 | 190     | 195 | 154     | 185 | 254     | 254 | 187     | 189 | 181    | 250 | 183    | 194 | 175    | 179 | 117     | 138 | 126     | 139 | 127    | 151 | 160      | 164 |
| 21                                                                                                                                                                                                                                         | 57 Richter                                   | 137  | 143 | 246   | 268 | 231   | 257 | 241    | 266 | 189    | 207 | 237    | 245 | 195     | 213 | 137     | 141 | 242     | 262 | 173     | 218 | 178    | 190 | 176    | 180 | 171    | 187 | 126     | 141 | 126     | 133 | 129    | 133 | 160      | 172 |
| 22                                                                                                                                                                                                                                         | 6736 Castel                                  | 127  | 137 | 236   | 266 | 251   | 261 | 241    | 243 | 207    | 217 | 223    | 245 | 189     | 195 | 137     | 158 | 254     | 262 | 184     | 187 | 184    | 287 | 176    | 183 | 179    | 187 | 138     | 141 | 129     | 129 | 133    | 135 | 152      | 156 |
| 23                                                                                                                                                                                                                                         | 775 Paulsen                                  | 137  | 147 | 226   | 236 | 231   | 261 | 241    | 254 | 191    | 207 | 223    | 255 | 195     | 209 | 137     | 137 | 250     | 262 | 165     | 218 | 184    | 243 | 183    | 194 | 175    | 187 | 120     | 141 | 126     | 146 | 129    | 135 | 156      | 163 |
| 24                                                                                                                                                                                                                                         | 779 Paulsen                                  | 137  | 149 | 236   | 268 | 231   | 257 | 241    | 251 | 203    | 205 | 245    | 255 | 195     | 209 | 137     | 137 | 250     | 258 | 173     | 218 | 178    | 243 | 183    | 194 | 175    | 187 | 117     | 129 | 126     | 149 | 129    | 135 | 156      | 166 |
| 25                                                                                                                                                                                                                                         | 99 Richter                                   | 137  | 149 | 236   | 236 | 231   | 261 | 241    | 251 | 191    | 207 | 223    | 239 | 195     | 209 | 137     | 137 | 250     | 262 | 173     | 187 | 178    | 184 | 183    | 194 | 175    | 187 | 117     | 129 | 126     | 146 | 129    | 133 | 160      | 166 |
| 26                                                                                                                                                                                                                                         | Berlandieri x Colombard 1 B or Blanchard 1 B | 143  | 145 | 232   | 236 | 231   | 253 | 257    | 259 | 183    | 191 | 247    | 251 | 199     | 219 | 135     | 137 | 244     | 248 | 189     | 189 | 181    | 184 | 183    | 194 | 171    | 187 | 114     | 138 | 133     | 142 | 125    | 161 | 146      | 162 |
| 27                                                                                                                                                                                                                                         | Berlandieri-Colombard 2                      | 143  | 145 | 226   | 236 | 231   | 249 | 257    | 259 |        |     |        |     |         |     |         |     |         |     |         |     |        |     |        |     |        |     |         |     |         |     |        |     |          |     |

**Supplemental Data for:**

Migliaro D, De Lorenzis G, Di Lorenzo GS, De Nardi B, Gardiman M, Failla O, Brancadoro L and Crespan M. 2019.

Grapevine non-*vinifera* genetic diversity assessed by simple sequence repeat markers as a starting point for new rootstock breeding programs. Am J Enol Vitic 70:390-397. doi: 10.5344/ajev.2019.18054.

| Supplemental Table 3 (cont.) Allelic profiles at 17 simple sequence repeat (SSR) loci of 232 grapevine rootstock genotypes. Original questionable accession names are converted to “no name.” Suggested names for uncertain varieties are in bold. |                                |      |     |       |     |       |     |        |     |        |     |        |     |         |     |         |     |         |     |         |     |        |     |        |     |        |     |         |     |         |     |        |     |          |     |
|----------------------------------------------------------------------------------------------------------------------------------------------------------------------------------------------------------------------------------------------------|--------------------------------|------|-----|-------|-----|-------|-----|--------|-----|--------|-----|--------|-----|---------|-----|---------|-----|---------|-----|---------|-----|--------|-----|--------|-----|--------|-----|---------|-----|---------|-----|--------|-----|----------|-----|
| SSR<br>profile<br>ID                                                                                                                                                                                                                               | Variety                        | VVS2 |     | VVMD5 |     | VVMD7 |     | VVMD25 |     | VVMD27 |     | VVMD28 |     | VrZAG62 |     | VrZAG64 |     | VrZAG79 |     | VrZAG83 |     | VChr3a |     | VChr4a |     | VChr7b |     | VChr10b |     | VChr19a |     | VMC6E1 |     | VMCNG4b9 |     |
| 58                                                                                                                                                                                                                                                 | <i>Vitis rupestris</i> du Lot  | 137  | 137 | 236   | 268 | 257   | 261 | 241    | 241 | 205    | 207 | 223    | 245 | 195     | 195 | 137     | 137 | 258     | 262 | 187     | 218 | 178    | 184 | 176    | 183 | 187    | 187 | 129     | 141 | 126     | 129 | 133    | 135 | 156      | 160 |
| 59                                                                                                                                                                                                                                                 | <i>V. rupestris</i> Gaillard   | 133  | 145 | 252   | 266 | 251   | 261 | 241    | 245 | 205    | 207 | 223    | 239 | 189     | 197 | 141     | 158 | 252     | 256 | 184     | 187 | 181    | 181 | 176    | 183 | 179    | 195 | 126     | 135 | 126     | 129 | 133    | 135 | 151      | 162 |
| 60                                                                                                                                                                                                                                                 | <i>V. rupestris</i> Martin     | 123  | 133 | 246   | 252 | 259   | 260 | 241    | 241 | 185    | 186 | 223    | 249 | 179     | 205 | 141     | 154 | 254     | 254 | 187     | 218 | 181    | 254 | 176    | 183 | 187    | 187 | 135     | 138 | 126     | 133 | 133    | 135 | 162      | 164 |
| 61                                                                                                                                                                                                                                                 | <i>V. rupestris</i> Metallique | 139  | 139 | 252   | 252 | 251   | 260 | 241    | 247 | 185    | 205 | 219    | 249 | 195     | 201 | 137     | 156 | 256     | 260 | 184     | 218 | 181    | 181 | 183    | 183 | 179    | 183 | 126     | 141 | 129     | 129 | 121    | 133 | 164      | 164 |
| 62                                                                                                                                                                                                                                                 | 17-37 Millardet et de Grasset  | 133  | 165 | 234   | 252 | 231   | 259 | 241    | 262 | 193    | 201 | 249    | 249 | 201     | 215 | 137     | 150 | 254     | 254 | 189     | 218 | 181    | 187 | 180    | 194 | 167    | 195 | 117     | 147 | 136     | 139 | 127    | 133 | 160      | 164 |
| 63                                                                                                                                                                                                                                                 | 93-5 C                         | 133  | 137 | 226   | 226 | 249   | 249 | 243    | 245 | 194    | 207 | 253    | 261 | 201     | 203 | 139     | 158 | 254     | 256 | 187     | 195 | 187    | 206 | 183    | 194 | 179    | 191 | 126     | 129 | 129     | 142 | 133    | 165 | 162      | 164 |
| 64                                                                                                                                                                                                                                                 | M1                             | 141  | 149 | 236   | 266 | 231   | 265 | 241    | 251 | 211    | 211 | 219    | 255 | 199     | 209 | 137     | 158 | 258     | 258 | 158     | 165 | 175    | 243 | 183    | 183 | 179    | 183 | 117     | 138 | 139     | 146 | 157    | 157 | 152      | 163 |
| 65                                                                                                                                                                                                                                                 | M2                             | 137  | 147 | 266   | 268 | 233   | 257 | 241    | 254 | 189    | 211 | 239    | 245 | 195     | 213 | 137     | 158 | 242     | 258 | 165     | 187 | 178    | 178 | 183    | 194 | 175    | 187 | 138     | 141 | 126     | 149 | 129    | 157 | 160      | 163 |
| 66                                                                                                                                                                                                                                                 | M3                             | 141  | 149 | 236   | 266 | 233   | 265 | 241    | 251 | 211    | 211 | 219    | 255 | 199     | 213 | 158     | 172 | 258     | 258 | 158     | 184 | 175    | 243 | 183    | 183 | 175    | 179 | 138     | 138 | 139     | 146 | 157    | 157 | 163      | 166 |
| 67                                                                                                                                                                                                                                                 | M4                             | 147  | 147 | 236   | 236 | 251   | 257 | 243    | 254 | 203    | 207 | 245    | 247 | 191     | 195 | 137     | 172 | 250     | 254 | 158     | 187 | 178    | 265 | 176    | 183 | 179    | 183 | 120     | 138 | 139     | 146 | 133    | 133 | 160      | 166 |
| 68                                                                                                                                                                                                                                                 | genotype 01                    | 133  | 161 | 252   | 264 | 251   | 259 | 241    | 243 | 186    | 215 | 223    | 243 | 179     | 192 | 141     | 143 | 254     | 254 | 184     | 218 | 181    | 181 | 176    | 183 | 179    | 187 | 138     | 138 | 126     | 133 | 133    | 135 | 160      | 162 |
| 69                                                                                                                                                                                                                                                 | genotype 02                    | 143  | 147 | 238   | 266 | 231   | 251 | 254    | 259 | 185    | 203 | 219    | 263 | 191     | 203 | 141     | 172 | 250     | 254 | 183     | 184 | 175    | 184 | 183    | 210 | 179    | 183 | 114     | 138 | 133     | 139 | 129    | 129 | 146      | 161 |
| 70                                                                                                                                                                                                                                                 | genotype 03                    | 145  | 149 | 252   | 264 | 239   | 245 | 243    | 251 | 215    | 219 | 255    | 255 | 177     | 189 | 137     | 156 | 258     | 260 | 184     | 184 | 181    | 243 | 183    | 194 | 179    | 179 | 117     | 144 | 133     | 146 | 121    | 129 | 151      | 166 |
| 71                                                                                                                                                                                                                                                 | genotype 04                    | 127  | 133 | 234   | 234 | 237   | 239 | 245    | 255 | 193    | 193 | 237    | 263 | 193     | 195 | 143     | 158 | 250     | 256 | 188     | 191 | 169    | 184 | 187    | 194 | 183    | 191 | 117     | 129 | 129     | 129 | 127    | 133 | 154      | 158 |
| 72                                                                                                                                                                                                                                                 | genotype 05                    | 137  | 145 | 236   | 236 | 233   | 257 | 241    | 243 | 203    | 207 | 239    | 245 | 195     | 213 | 137     | 172 | 250     | 254 | 158     | 165 | 178    | 178 | 183    | 194 | 179    | 187 | 120     | 138 | 139     | 146 | 129    | 133 | 160      | 161 |
| 73                                                                                                                                                                                                                                                 | genotype 06                    | 141  | 149 | 236   | 236 | 233   | 261 | 241    | 251 | 191    | 191 | 223    | 255 | 195     | 213 | 137     | 137 | 250     | 250 | 165     | 173 | 184    | 243 | 183    | 194 | 179    | 187 | 117     | 129 | 146     | 146 | 133    | 157 | 160      | 166 |
| 74                                                                                                                                                                                                                                                 | genotype 07                    | 139  | 143 | 226   | 252 | 239   | 245 | 243    | 247 | 191    | 205 | 231    | 255 | 177     | 189 | 137     | 156 | 250     | 256 | 184     | 187 | 181    | 243 | 183    | 183 | 179    | 179 | 117     | 144 | 136     | 146 | 129    | 133 | 151      | 151 |
| 75                                                                                                                                                                                                                                                 | genotype 09                    | 137  | 149 | 236   | 268 | 257   | 265 | 241    | 251 | 205    | 211 | 237    | 255 | 195     | 199 | 137     | 172 | 258     | 258 | 184     | 189 | 190    | 243 | 183    | 194 | 175    | 187 | 138     | 141 | 126     | 139 | 129    | 129 | 160      | 166 |
| 76                                                                                                                                                                                                                                                 | genotype 10                    | 145  | 147 | 226   | 266 | 231   | 265 | 243    | 254 | 203    | 211 | 239    | 247 | 199     | 209 | 137     | 172 | 250     | 258 | 165     | 184 | 178    | 265 | 183    | 194 | 179    | 183 | 117     | 138 | 136     | 149 | 129    | 133 | 161      | 166 |
| 77                                                                                                                                                                                                                                                 | genotype 11                    | 139  | 141 | 252   | 264 | 255   | 259 | 243    | 247 | 195    | 211 | 239    | 253 | 186     | 199 | 137     | 150 | 254     | 256 | 184     | 187 | 169    | 178 | 183    | 198 | 179    | 195 | 126     | 138 | 129     | 142 | 133    | 133 | 151      | 152 |
| 78                                                                                                                                                                                                                                                 | genotype 12                    | 137  | 145 | 236   | 236 | 233   | 265 | 241    | 243 | 203    | 211 | 219    | 245 | 199     | 213 | 137     | 137 | 250     | 258 | 158     | 165 | 175    | 178 | 176    | 183 | 179    | 187 | 117     | 129 | 129     | 139 | 133    | 157 | 160      | 163 |
| 79                                                                                                                                                                                                                                                 | genotype 13                    | 137  | 145 | 234   | 236 | 233   | 257 | 241    | 251 | 189    | 207 | 223    | 247 | 195     | 213 | 141     | 158 | 242     | 254 | 165     | 218 | 184    | 265 | 183    | 183 | 175    | 191 | 114     | 138 | 129     | 149 | 133    | 157 | 161      | 172 |
| 80                                                                                                                                                                                                                                                 | <b>228-1 Castel</b>            | 137  | 155 | 252   | 268 | 259   | 261 | 241    | 259 | 195    | 205 | 223    | 253 | 195     | 199 | 137     | 160 | 256     | 258 | 187     | 187 | 178    | 184 | 183    | 198 | 179    | 187 | 129     | 138 | 126     | 136 | 133    | 135 | 160      | 161 |
| 81                                                                                                                                                                                                                                                 | genotype 15                    | 141  | 165 | 252   | 266 | 259   | 265 | 241    | 262 | 191    | 193 | 219    | 219 | 199     | 201 | 137     | 137 | 250     | 254 | 184     | 218 | 175    | 187 | 180    | 194 | 175    | 195 | 117     | 147 | 136     | 139 | 133    | 157 | 152      | 164 |
| 82                                                                                                                                                                                                                                                 | genotype 16                    | 141  | 149 | 266   | 266 | 233   | 265 | 241    | 251 | 203    | 211 | 219    | 255 | 199     | 213 | 158     | 172 | 250     | 258 | 165     | 165 | 175    | 243 | 183    | 194 | 175    | 179 | 138     | 138 | 139     | 146 | 129    | 157 | 152      | 161 |
| 83                                                                                                                                                                                                                                                 | genotype 17                    | 127  | 149 | 264   | 264 | 245   | 263 | 251    | 275 | 191    | 193 | 239    | 247 | 189     | 190 | 137     | 185 | 250     | 254 | 184     | 189 | 181    | 245 | 183    | 183 | 175    | 179 | 117     | 138 | 126     | 139 | 127    | 129 | 151      | 160 |
| 84                                                                                                                                                                                                                                                 | genotype 18                    | 125  | 139 | 252   | 252 | 250   | 261 | 247    | 253 | 185    | 185 | 249    | 251 | 189     | 195 | 137     | 152 | 244     | 260 | 187     | 218 | 181    | 181 | 176    | 183 | 179    | 195 | 126     | 138 | 123     |     |        |     |          |     |

Supplemental Data for:

Migliaro D, De Lorenzis G, Di Lorenzo GS, De Nardi B, Gardiman M, Failla O, Brancadoro L and Crespan M. 2019. Grapevine non-*vinifera* genetic diversity assessed by simple sequence repeat markers as a starting point for new rootstock breeding programs. Am J Enol Vitic 70:390-397. doi: 10.5344/ajev.2019.18054.

| Supplemental Table 3 (cont.) Allelic profiles at 17 simple sequence repeat (SSR) loci of 232 grapevine rootstock genotypes. Original questionable accession names are converted to “no name.” Suggested names for uncertain varieties are in bold. |                             |         |         |         |         |         |         |         |                 |         |         |         |         |         |         |         |         |          |  |
|----------------------------------------------------------------------------------------------------------------------------------------------------------------------------------------------------------------------------------------------------|-----------------------------|---------|---------|---------|---------|---------|---------|---------|-----------------|---------|---------|---------|---------|---------|---------|---------|---------|----------|--|
| SSR profile ID                                                                                                                                                                                                                                     | Variety                     | VVS2    | VVMD5   | VVMD7   | VVMD25  | VVMD27  | VVMD28  | VrZAG62 | VrZAG64         | VrZAG79 | VrZAG83 | VChr3a  | VChr4a  | VChr7b  | VChr10b | VChr19a | VMC6E1  | VMCNG4b9 |  |
| 119                                                                                                                                                                                                                                                | genotype 53                 | 135 141 | 262 266 | 251 261 | 241 249 | 207 207 | 247 253 | 191 193 | 168 172         | 254 254 | 158 189 | 265 265 | 183 194 | 179 187 | 129 138 | 133 136 | 133 157 | 151 160  |  |
| 120                                                                                                                                                                                                                                                | genotype 54                 | 145 155 | 228 232 | 233 263 | 0 0     | 189 189 | 237 239 | 193 193 | 135 148         | 250 258 | 195 195 | 199 199 | 194 206 | 171 183 | 129 138 | 123 142 | 151 157 | 158 162  |  |
| 121                                                                                                                                                                                                                                                | genotype 55                 | 137 171 | 264 266 | 251 255 | 241 243 | 207 215 | 237 247 | 187 189 | 141 158         | 254 254 | 184 187 | 290 296 | 194 194 | 191 195 | 132 138 | 126 129 | 133 133 | 152 162  |  |
| 122                                                                                                                                                                                                                                                | genotype 56                 | 139 167 | 264 264 | 233 257 | 249 259 | 189 207 | 253 255 | 173 189 | 137 148         | 236 260 | 181 218 | 140 181 | 183 195 | 195 195 | 117 135 | 133 156 | 131 153 | 151 158  |  |
| 123                                                                                                                                                                                                                                                | genotype 57                 | 137 149 | 252 264 | 243 251 | 242 243 | 191 207 | 237 243 | 189 189 | 156 158         | 254 260 | 184 184 | 156 156 | 183 183 | 179 179 | 126 138 | 136 139 | 133 133 | 151 151  |  |
| 124                                                                                                                                                                                                                                                | genotype 58                 | 145 151 | 264 266 | 243 251 | 243 259 | 207 211 | 219 249 | 179 191 | 154 158         | 248 258 | 184 184 | 175 268 | 183 194 | 179 195 | 126 138 | 126 139 | 151 157 | 161 165  |  |
| 125                                                                                                                                                                                                                                                | Lindley                     | 125 133 | 228 232 | 235 247 | 245 246 | 187 189 | 221 233 | 201 203 | 137 139         | 246 258 | 191 191 | 178 199 | 198 198 | 183 187 | 120 132 | 123 133 | 129 165 | 150 158  |  |
| 126                                                                                                                                                                                                                                                | genotype 60                 | 123 137 | 234 266 | 243 249 | 243 251 | 187 215 | 247 247 | 189 190 | 127 166         | 238 258 | 184 189 | 175 287 | 183 194 | 191 195 | 126 138 | 139 139 | 133 157 | 158 160  |  |
| 127                                                                                                                                                                                                                                                | genotype 61                 | 145 151 | 224 242 | 247 247 | 245 271 | 179 179 | 237 261 | 195 203 | 139 150         | 250 252 | 189 195 | 206 222 | 194 198 | 179 183 | 129 129 | 139 146 | 141 169 | 164 176  |  |
| 128                                                                                                                                                                                                                                                | genotype 62                 | 135 141 | 264 264 | 239 251 | 241 243 | 209 209 | 245 253 | 189 189 | 154 158         | 254 256 | 187 187 | 169 181 | 183 183 | 179 183 | 138 141 | 133 139 | 133 133 | 151 160  |  |
| 129                                                                                                                                                                                                                                                | genotype 63                 | 143 147 | 226 238 | 231 231 | 254 259 | 203 209 | 255 285 | 203 209 | 137 172 and 174 | 250 250 | 184 184 | 181 243 | 183 210 | 179 183 | 114 138 | 133 139 | 127 157 | 146 161  |  |
| 130                                                                                                                                                                                                                                                | genotype 64                 | 143 159 | 262 266 | 251 255 | 242 243 | 215 217 | 241 247 | 179 189 | 139 141         | 254 260 | 187 187 | 175 296 | 183 194 | 179 195 | 135 138 | 126 139 | 133 141 | 160 163  |  |
| 131                                                                                                                                                                                                                                                | genotype 65                 | 133 159 | 252 264 | 255 257 | 239 247 | 186 209 | 243 245 | 189 193 | 150 172         | 258 258 | 184 218 | 287 287 | 176 194 | 167 179 | 138 138 | 129 139 | 133 151 | 151 164  |  |
| 132                                                                                                                                                                                                                                                | genotype 66                 | 145 155 | 228 232 | 239 251 | 245 271 | 189 189 | 237 267 | 193 195 | 135 150         | 238 250 | 189 201 | 178 222 | 198 198 | 179 187 | 138 138 | 139 142 | 151 165 | 162 184  |  |
| 133                                                                                                                                                                                                                                                | <b>Ganzin 2</b>             | 133 137 | 234 252 | 239 249 | 241 245 | 194 207 | 253 263 | 195 201 | 137 158         | 254 256 | 187 191 | 184 206 | 183 194 | 183 191 | 129 141 | 120 129 | 133 165 | 158 158  |  |
| 134                                                                                                                                                                                                                                                | genotype 68                 | 143 155 | 252 266 | 239 239 | 241 243 | 207 217 | 245 247 | 189 189 | 141 158         | 254 260 | 184 184 | 181 302 | 176 183 | 179 179 | 138 138 | 126 139 | 133 133 | 163 163  |  |
| 135                                                                                                                                                                                                                                                | genotype 69                 | 143 145 | 246 266 | 257 265 | 243 267 | 189 191 | 219 237 | 195 199 | 141 158         | 242 250 | 165 189 | 175 190 | 183 194 | 175 187 | 126 138 | 126 139 | 129 157 | 160 161  |  |
| 136                                                                                                                                                                                                                                                | genotype 70                 | 139 143 | 228 258 | 231 251 | 259 259 | 189 189 | 223 245 | 183 219 | 137 137         | 256 258 | 195 218 | 178 184 | 176 194 | 183 187 | 126 132 | 126 136 | 129 133 | 162 164  |  |
| 137                                                                                                                                                                                                                                                | genotype 71                 | 141 149 | 266 266 | 233 265 | 241 251 | 191 211 | 219 255 | 199 213 | 137 158         | 250 258 | 158 165 | 175 243 | 183 183 | 175 179 | 117 138 | 139 146 | 157 157 | 152 163  |  |
| 138                                                                                                                                                                                                                                                | genotype 72                 | 143 145 | 234 266 | 251 257 | 243 267 | 189 191 | 237 247 | 191 195 | 137 141         | 242 250 | 184 218 | 190 265 | 180 183 | 179 191 | 114 117 | 129 149 | 129 157 | 166 172  |  |
| 139                                                                                                                                                                                                                                                | genotype 73                 | 137 145 | 252 266 | 265 265 | 243 257 | 203 213 | 219 247 | 199 199 | 139 158         | 250 256 | 158 187 | 175 265 | 183 183 | 175 179 | 138 147 | 139 146 | 151 157 | 162 163  |  |
| 140                                                                                                                                                                                                                                                | genotype 74                 | 141 145 | 236 266 | 231 265 | 241 243 | 191 211 | 255 255 | 199 209 | 158 172         | 250 258 | 165 165 | 243 243 | 183 194 | 179 179 | 138 138 | 139 146 | 157 157 | 152 161  |  |
| 141                                                                                                                                                                                                                                                | genotype 75                 | 141 147 | 236 266 | 233 257 | 241 254 | 207 211 | 245 255 | 195 213 | 137 137         | 258 262 | 184 187 | 178 243 | 183 194 | 175 187 | 117 120 | 139 146 | 129 129 | 152 163  |  |
| 142                                                                                                                                                                                                                                                | genotype 76                 | 137 141 | 226 266 | 251 261 | 241 241 | 207 207 | 219 223 | 191 195 | 137 137         | 254 262 | 184 218 | 175 184 | 183 183 | 175 179 | 117 141 | 136 146 | 129 135 | 152 163  |  |
| 143                                                                                                                                                                                                                                                | genotype 77                 | 145 147 | 226 252 | 233 265 | 243 243 | 203 213 | 219 255 | 199 213 | 137 172         | 250 254 | 158 184 | 181 243 | 183 194 | 179 179 | 117 138 | 139 146 | 129 157 | 162 163  |  |
| 144                                                                                                                                                                                                                                                | genotype 78                 | 139 159 | 264 264 | 251 251 | 243 271 | 186 207 | 235 245 | 189 189 | 137 152         | 256 260 | 184 184 | 181 181 | 194 194 | 179 195 | 126 135 | 129 129 | 133 135 | 151 164  |  |
| 145                                                                                                                                                                                                                                                | genotype 79                 | 137 143 | 228 266 | 231 265 | 257 259 | 189 207 | 245 247 | 199 219 | 137 172         | 254 258 | 184 195 | 184 265 | 194 194 | 187 195 | 132 138 | 136 139 | 129 151 | 162 162  |  |
| 146                                                                                                                                                                                                                                                | genotype 80                 | 145 145 | 266 266 | 233 265 | 243 243 | 191 211 | 219 239 | 199 213 | 137 172         | 250 258 | 158 165 | 175 178 | 183 183 | 179 179 | 117 138 | 139 139 | 129 133 | 161 163  |  |
| 147                                                                                                                                                                                                                                                | genotype 81                 | 143 149 | 234 266 | 231 233 | 251 267 | 189 207 | 237 247 | 213 213 | 141 158         | 242 254 | 165 218 | 184 265 | 180 183 | 175 187 | 114 138 | 149 165 | 129 133 | 160 166  |  |
| 148                                                                                                                                                                                                                                                | genotype 82                 | 133 145 | 266 266 | 231 249 | 243 245 | 194 211 | 253 255 | 201 209 | 139 158         | 256 258 | 158 195 | 206 243 | 183 194 | 183 191 | 126 138 | 129 139 | 133 157 | 161 164  |  |
| 149                                                                                                                                                                                                                                                | genotype 83                 | 137 149 | 236 236 | 233 261 | 241 251 | 207 211 | 223 255 | 195 213 | 137 137         | 258 262 | 165 187 | 184 243 | 183 194 | 175 179 | 117 129 | 126 146 | 129 133 | 166 166  |  |
| 150                                                                                                                                                                                                                                                | <b>GEILWEILERHOF V. 348</b> | 143 151 | 226 228 | 239 249 | 253 259 | 181 185 | 231 239 | 193 203 | 137 158         | 238 242 | 189 189 | 199 199 | 183 198 | 187 187 | 129 132 | 123 133 | 143 165 | 138 162  |  |
| 151                                                                                                                                                                                                                                                | <b>Tergi</b>                | 139 145 | 262 264 | 239 251 | 243 271 | 186 209 | 237 245 | 189 189 | 137 141         | 254 256 | 187 218 | 131 296 | 176 194 | 179 195 | 126 132 | 129 129 | 133 135 | 160 164  |  |
| 152                                                                                                                                                                                                                                                | genotype 86                 | 129 129 | 252 252 | 235 235 | 238 238 | 209 209 | 249 249 | 187 205 | 133 148         | 254 258 | 187 187 | 169 181 | 176 176 | 168 168 | 126 126 | 133 133 | 147 171 | 152 152  |  |
| 153                                                                                                                                                                                                                                                | genotype 87                 | 157 159 | 250 250 | 241 241 | 245 245 | 203 203 | 235 251 | 195 197 | 148 154         | 246 246 | 187 187 | 178 181 | 176 194 | 167 167 | 126 126 | 133 136 | 145 155 | 148 162  |  |
|                                                                                                                                                                                                                                                    |                             |         |         |         |         |         |         |         |                 |         |         |         |         |         |         |         |         |          |  |

Supplemental Data for:

Migliaro D, De Lorenzis G, Di Lorenzo GS, De Nardi B, Gardiman M, Failla O, Brancadoro L and Crespan M. 2019. Grapevine non-*vinifera* genetic diversity assessed by simple sequence repeat markers as a starting point for new rootstock breeding programs. Am J Enol Vitic 70:390-397. doi: 10.5344/ajev.2019.18054.

| Supplemental Table 3 (cont.) Allelic profiles at 17 simple sequence repeat (SSR) loci of 232 grapevine rootstock genotypes. Original questionable accession names are converted to “no name.” Suggested names for uncertain varieties are in bold. |                                         |         |         |         |         |         |         |         |         |         |         |         |         |         |         |         |         |          |  |
|----------------------------------------------------------------------------------------------------------------------------------------------------------------------------------------------------------------------------------------------------|-----------------------------------------|---------|---------|---------|---------|---------|---------|---------|---------|---------|---------|---------|---------|---------|---------|---------|---------|----------|--|
| SSR profile ID                                                                                                                                                                                                                                     | Variety                                 | VVS2    | VVMD5   | VVMD7   | VVMD25  | VVMD27  | VVMD28  | VrZAG62 | VrZAG64 | VrZAG79 | VrZAG83 | VChr3a  | VChr4a  | VChr7b  | VChr10b | VChr19a | VMC6E1  | VMCNG4b9 |  |
| 180                                                                                                                                                                                                                                                | genotype 114                            | 135 159 | 262 262 | 239 251 | 253 275 | 195 213 | 237 253 | 193 193 | 139 143 | 260 262 | 187 189 | 190 190 | 176 187 | 179 187 | 120 129 | 136 142 | 137 141 | 162 164  |  |
| 181                                                                                                                                                                                                                                                | genotype 115                            | 137 149 | 226 236 | 231 249 | 241 251 | 179 191 | 247 255 | 187 209 | 137 139 | 250 260 | 173 201 | 209 243 | 183 194 | 179 183 | 117 126 | 129 146 | 129 143 | 166 172  |  |
| 182                                                                                                                                                                                                                                                | <b>1132 Grimaldi</b>                    | 137 143 | 232 252 | 249 253 | 241 271 | 189 194 | 239 247 | 199 201 | 139 139 | 250 260 | 184 191 | 196 287 | 194 198 | 179 183 | 126 132 | 136 142 | 133 169 | 162 164  |  |
| 183                                                                                                                                                                                                                                                | <b>1331 Paulsen</b>                     | 133 149 | 226 252 | 233 259 | 241 251 | 186 191 | 239 249 | 179 213 | 137 154 | 250 254 | 165 218 | 178 254 | 176 194 | 175 187 | 117 135 | 126 149 | 129 133 | 163 164  |  |
| 184                                                                                                                                                                                                                                                | genotype 118                            | 143 151 | 252 266 | 251 261 | 271 277 | 213 217 | 241 245 | 190 201 | 150 156 | 254 256 | 184 218 | 131 296 | 183 194 | 179 187 | 138 138 | 129 129 | 133 161 | 152 163  |  |
| 185                                                                                                                                                                                                                                                | genotype 119                            | 143 147 | 226 264 | 231 243 | 243 254 | 191 207 | 239 255 | 189 209 | 137 158 | 250 258 | 173 184 | 243 287 | 183 194 | 179 183 | 117 126 | 126 146 | 129 133 | 162 166  |  |
| 186                                                                                                                                                                                                                                                | <b>125-1 Millardet et de Grasset</b>    | 141 143 | 262 264 | 239 251 | 241 243 | 186 209 | 253 253 | 189 201 | 137 154 | 254 256 | 187 187 | 169 169 | 183 194 | 167 179 | 126 141 | 129 139 | 133 133 | 152 160  |  |
| 187                                                                                                                                                                                                                                                | <b>143 B Millardet et de Grasset</b>    | 143 143 | 234 264 | 239 251 | 243 259 | 181 201 | 239 263 | 189 195 | 158 158 | 242 252 | 184 195 | 156 184 | 176 183 | 179 187 | 126 129 | 120 129 | 133 143 | 151 170  |  |
| 188                                                                                                                                                                                                                                                | <b>16-107 Prosperi</b>                  | 137 143 | 264 266 | 251 261 | 243 243 | 217 219 | 243 245 | 195 219 | 143 156 | 258 260 | 184 187 | 265 299 | 183 183 | 179 183 | 138 138 | 129 129 | 131 133 | 152 162  |  |
| 189                                                                                                                                                                                                                                                | <b>16-108 Prosperi</b>                  | 137 143 | 264 266 | 243 261 | 243 243 | 217 219 | 245 253 | 195 199 | 143 156 | 258 260 | 184 187 | 175 181 | 183 183 | 179 179 | 138 138 | 129 129 | 133 133 | 151 151  |  |
| 190                                                                                                                                                                                                                                                | <b>16-109 Prosperi</b>                  | 133 137 | 262 264 | 251 260 | 241 243 | 217 219 | 245 253 | 195 219 | 137 156 | 258 260 | 184 187 | 175 181 | 183 183 | 179 179 | 129 138 | 126 129 | 131 133 | 151 162  |  |
| 191                                                                                                                                                                                                                                                | genotype 125                            | 145 147 | 236 266 | 233 251 | 243 254 | 191 211 | 247 255 | 191 213 | 137 172 | 250 258 | 173 184 | 243 265 | 183 194 | 175 179 | 117 138 | 139 146 | 129 157 | 152 166  |  |
| 192                                                                                                                                                                                                                                                | <b>202-4 Millardet et de Grasset</b>    | 135 155 | 234 252 | 255 259 | 247 259 | 183 209 | 251 265 | 189 199 | 137 148 | 242 260 | 184 187 | 181 196 | 194 198 | 179 203 | 120 138 | 136 136 | 133 135 | 151 163  |  |
| 193                                                                                                                                                                                                                                                | <b>205 Ruggeri</b>                      | 141 149 | 226 266 | 233 251 | 241 251 | 203 211 | 239 247 | 191 213 | 137 172 | 250 258 | 158 173 | 178 265 | 183 194 | 175 179 | 120 138 | 139 149 | 129 157 | 161 166  |  |
| 194                                                                                                                                                                                                                                                | <b>240 Ruggeri</b>                      | 143 149 | 226 264 | 231 245 | 243 251 | 191 219 | 239 255 | 189 213 | 137 158 | 250 258 | 165 184 | 243 245 | 183 194 | 175 179 | 117 126 | 139 146 | 129 133 | 151 166  |  |
| 195                                                                                                                                                                                                                                                | <b>300 Ruggeri</b>                      | 141 149 | 226 266 | 233 251 | 241 251 | 203 211 | 247 255 | 191 213 | 137 172 | 250 258 | 165 184 | 243 265 | 183 194 | 179 183 | 120 138 | 139 146 | 129 157 | 161 163  |  |
| 196                                                                                                                                                                                                                                                | genotype 130                            | 133 143 | 236 252 | 231 249 | 241 251 | 186 193 | 249 253 | 189 195 | 150 168 | 254 254 | 187 189 | 181 181 | 194 194 | 179 199 | 117 132 | 136 142 | 127 135 | 162 167  |  |
| 197                                                                                                                                                                                                                                                | genotype 131                            | 133 133 | 252 262 | 243 251 | 259 261 | 179 213 | 239 261 | 185 193 | 137 137 | 254 262 | 201 218 | 222 222 | 194 198 | 179 179 | 129 141 | 129 139 | 135 169 | 150 160  |  |
| 198                                                                                                                                                                                                                                                | <b>33 Ecole de Montpellier</b>          | 135 143 | 238 264 | 231 251 | 253 271 | 175 209 | 241 243 | 190 207 | 141 150 | 254 256 | 184 189 | 187 296 | 183 198 | 179 199 | 117 138 | 129 136 | 125 133 | 163 167  |  |
| 199                                                                                                                                                                                                                                                | <b>420 B Millardet et de Grasset</b>    | 127 141 | 238 262 | 231 263 | 243 275 | 191 209 | 247 259 | 190 195 | 137 156 | 252 254 | 187 189 | 181 250 | 183 194 | 175 179 | 117 138 | 126 142 | 127 151 | 160 164  |  |
| 200                                                                                                                                                                                                                                                | <b>44 Richter</b>                       | 133 147 | 226 246 | 231 259 | 241 254 | 185 191 | 223 255 | 179 209 | 137 141 | 250 254 | 165 218 | 181 243 | 183 194 | 183 187 | 117 138 | 133 149 | 129 133 | 164 166  |  |
| 201                                                                                                                                                                                                                                                | genotype 135                            | 133 137 | 266 266 | 249 255 | 241 241 | 185 207 | 233 253 | 186 201 | 135 137 | 246 254 | 184 184 | 178 206 | 183 183 | 179 195 | 138 141 | 129 129 | 133 133 | 158 162  |  |
| 202                                                                                                                                                                                                                                                | <b>7605 Castel</b>                      | 135 161 | 264 264 | 231 251 | 241 255 | 197 207 | 237 245 | 189 217 | 150 150 | 254 260 | 184 189 | 181 287 | 176 180 | 179 183 | 117 138 | 129 136 | 129 133 | 152 172  |  |
| 203                                                                                                                                                                                                                                                | <b>764 Paulsen</b>                      | 137 147 | 226 268 | 233 261 | 241 254 | 203 205 | 223 239 | 195 213 | 137 137 | 250 258 | 165 187 | 178 184 | 176 194 | 175 187 | 117 141 | 126 146 | 129 133 | 160 166  |  |
| 204                                                                                                                                                                                                                                                | <b>782 Paulsen</b>                      | 137 147 | 226 236 | 231 257 | 241 254 | 191 205 | 239 245 | 195 209 | 137 137 | 250 258 | 165 218 | 178 178 | 183 194 | 183 187 | 117 129 | 129 149 | 129 133 | 156 166  |  |
| 205                                                                                                                                                                                                                                                | <b>Caselle</b>                          | 139 149 | 236 236 | 257 261 | 241 251 | 205 205 | 219 245 | 195 195 | 137 156 | 256 258 | 165 173 | 178 181 | 183 194 | 179 187 | 129 141 | 129 149 | 129 135 | 156 164  |  |
| 206                                                                                                                                                                                                                                                | <b>Dufour 11 F</b>                      | 133 143 | 264 264 | 251 251 | 241 242 | 186 201 | 245 247 | 189 189 | 143 152 | 260 270 | 187 187 | 181 257 | 183 194 | 179 179 | 138 138 | 129 136 | 133 139 | 151 151  |  |
| 207                                                                                                                                                                                                                                                | <b>Gagliardo</b>                        | 137 143 | 226 236 | 249 261 | 241 241 | 181 207 | 237 245 | 189 195 | 137 150 | 258 262 | 195 218 | 178 265 | 183 198 | 179 187 | 129 138 | 129 136 | 135 165 | 156 172  |  |
| 208                                                                                                                                                                                                                                                | <b>Geilweilerhof GA-52-42</b>           | 143 151 | 228 236 | 237 247 | 253 259 | 181 189 | 231 239 | 178 193 | 135 141 | 244 254 | 189 191 | 199 287 | 183 183 | 179 187 | 138 138 | 133 133 | 133 161 | 150 158  |  |
| 209                                                                                                                                                                                                                                                | genotype 143                            | 137 137 | 264 264 | 249 257 | 241 241 | 207 207 | 223 261 | 189 195 | 137 158 | 254 262 | 195 218 | 184 187 | 176 176 | 179 187 | 129 129 | 129 142 | 133 135 | 156 172  |  |
| 210                                                                                                                                                                                                                                                | <b>Vitis novae-angliae Fernald</b>      | 141 141 | 234 264 | 241 251 | 259 259 | 187 191 | 237 239 | 179 189 | 137 170 | 248 258 | 187 191 | 178 181 | 183 183 | 179 183 | 120 138 | 126 149 | 129 133 | 150 158  |  |
| 211                                                                                                                                                                                                                                                | genotype 145                            | 139 145 | 264 266 | 251 251 | 243 259 | 189 207 | 243 247 | 183 191 | 139 172 | 258 258 | 184 187 | 178 265 | 183 194 | 179 187 | 138 138 | 136 136 | 133 157 | 161 162  |  |
| 212                                                                                                                                                                                                                                                | <b>V. riparia Martin des Paillieres</b> | 143 151 | 264 266 | 243 245 | 239 243 | 199 217 | 237 245 | 186 189 | 143 154 | 254 260 | 187 187 | 251 290 | 183 183 | 179 179 | 138 138 | 129 129 | 133 151 | 151 161  |  |
| 213                                                                                                                                                                                                                                                | genotype 147                            | 135 145 | 264 266 | 245 251 | 243 243 | 223 223 | 237 237 | 189 190 | 158 160 | 248 258 | 184 184 | 257 299 | 183 183 | 179 195 | 1       |         |         |          |  |
