# Supplementary material
Source: HighWire-hosted journal article supplement (https://www.ajevonline.org/content/suppl/2019/06/07/ajev.2019.18054)
Supplement: Supplemental_Table_5.pdf [file Supplemental_Table_5.pdf]

**Supplemental Data for:**

Migliaro D, De Lorenzis G, Di Lorenzo GS, De Nardi B, Gardiman M, Failla O, Brancadoro L and Crespan M. 2019.

Grapevine non-*vinifera* genetic diversity assessed by simple sequence repeat markers as a starting point for new rootstock breeding programs.

Am J Enol Vitic 70:390-397. doi: 10.5344/ajev.2019.18054.

**Supplemental Table 5** Genotypes subdivision depending on cluster membership (Q > 85%) and admixed (Q < 0.85) according to structure. Genotypes are in alphabetical order.

| Cluster 1 |                                         | Cluster 2 |                                           | Cluster 3 |                                              | Admixed |                                    |
|-----------|-----------------------------------------|-----------|-------------------------------------------|-----------|----------------------------------------------|---------|------------------------------------|
| 1         | 227-1 Castel                            | 1         | Cosmo 4                                   | 1         | Berlandieri x Colombard 1 B or Blanchard 1 B | 1       | Caselle                            |
| 2         | 228-1 Castel                            | 2         | Cosmo 7                                   | 2         | Berlandieri-Colombard 2                      | 2       | Cina                               |
| 3         | 3306 Couderc                            | 3         | Cosmo 9                                   | 3         | 1202 Couderc                                 | 3       | 196-17 Castel                      |
| 4         | 3309 Couderc                            | 4         | Cosmo 10                                  | 4         | 93-5 C                                       | 4       | 215-1 Castel                       |
| 5         | Des Bords Sableux                       | 5         | Kober 125 AA                              | 5         | 333 Ecole de Montpellier or Tisserand        | 5       | 216-3 Castel                       |
| 6         | Dufour 11 F                             | 6         | Kober 5BB                                 | 6         | 17-37 Millardet et de Grasset                | 6       | 6736 Castel                        |
| 7         | Freedom                                 | 7         | M1                                        | 7         | 41 B Millardet et de Grasset                 | 7       | 7605 Castel                        |
| 8         | Harmony                                 | 8         | M2                                        | 8         | Fercal                                       | 8       | 161.49 Couderc                     |
| 9         | 101.14 Millardet et de Grasset          | 9         | M3                                        | 9         | Ganzin 1                                     | 9       | 1613 Couderc                       |
| 10        | 125-1 Millardet et de Grasset           | 10        | M4                                        | 10        | Ganzin 2                                     | 10      | Dog Ridge                          |
| 11        | 16-107 Prosperi                         | 11        | 782 Paulsen                               | 11        | Geilweilerhof GA-52-42                       | 11      | 33 Ecole de Montpellier            |
| 12        | 16-108 Prosperi                         | 12        | 779 Paulsen                               | 12        | Geilweilerhof V. 348                         | 12      | 34 Ecole de Montpellier            |
| 13        | 16-109 Prosperi                         | 13        | 775 Paulsen                               | 13        | 1132 Grimaldi                                | 13      | 13-16 Evex                         |
| 14        | Solonis                                 | 14        | 764 Paulsen                               | 14        | Golia                                        | 14      | 13-44 Evex                         |
| 15        | Teleki 10 A                             | 15        | 1447 Paulsen                              | 15        | Isabella                                     | 15      | 13-5 Evex                          |
| 16        | Tergi                                   | 16        | 1103 Paulsen                              | 16        | Jacquez                                      | 16      | Gagliardo                          |
| 17        | <i>Vitis riparia</i> Colorado           | 17        | 1045 Paulsen                              | 17        | LN 33 or LLOYD'S NUMBER 33                   | 17      | Geisenheim 26                      |
| 18        | <i>V. riparia</i> Fabre                 | 18        | 99 Richter                                | 18        | Lindley                                      | 18      | Gravesac                           |
| 19        | <i>V. riparia</i> Grand Glabre          | 19        | 205 Ruggeri                               | 19        | genotype 04                                  | 19      | Grezo 1                            |
| 20        | <i>V. riparia</i> Lombard               | 20        | 300 Ruggeri                               | 20        | genotype 100                                 | 20      | Malegue 44.53                      |
| 21        | <i>V. riparia</i> Martin des Paillieres | 21        | SO 4                                      | 21        | genotype 104                                 | 21      | Martinez Zaporta 5 A               |
| 22        | <i>V. riparia</i> Pubescent blanc       | 22        | Teleki 8B Ferrari                         | 22        | genotype 107                                 | 22      | 106.8 Millardet et de Grasset      |
| 23        | <i>V. riparia</i> Scribner              | 23        | Teleki 8B                                 | 23        | genotype 109                                 | 23      | 143 B Millardet et de Grasset      |
| 24        | <i>V. riparia</i> sericea               | 24        | Teleki 5C                                 | 24        | genotype 113                                 | 24      | 202-4 Millardet et de Grasset      |
| 25        | <i>V. riparia</i> sombre                | 25        | <i>Vitis Berlandieri</i> Ressayguier n. 2 | 25        | genotype 114                                 | 25      | 420 A Millardet et de Grasset      |
| 26        | <i>V. riparia</i> tomenteux             | 26        | <i>V. riparia</i> Gloire de Montpellier   | 26        | genotype 130                                 | 26      | 420 B Millardet et de Grasset      |
| 27        | <i>Vitis rupestris</i> Constantia       | 27        | <i>V. rupestris</i> du Lot                | 27        | genotype 131                                 | 27      | Oberlin noir                       |
| 28        | <i>V. rupestris</i> Gaillard            | 28        | genotype 05                               | 28        | genotype 143                                 | 28      | 1331 Paulsen                       |
| 29        | <i>V. rupestris</i> Martin              | 29        | genotype 06                               | 29        | genotype 28                                  | 29      | 31 Richter                         |
| 30        | <i>V. rupestris</i> Metallique          | 30        | genotype 09                               | 30        | genotype 47                                  | 30      | 44 Richter                         |
| 31        | <i>V. rupestris</i> Velletri            | 31        | genotype 10                               | 31        | genotype 48                                  | 31      | 57 Richter                         |
| 32        | genotype 01                             | 32        | genotype 102                              | 32        | genotype 52                                  | 32      | 110 Richter                        |
| 33        | genotype 11                             | 33        | genotype 12                               | 33        | genotype 54                                  | 33      | 140 Ruggeri                        |
| 34        | genotype 118                            | 34        | genotype 125                              | 34        | genotype 61                                  | 34      | 240 Ruggeri                        |
| 35        | genotype 147                            | 35        | genotype 16                               | 35        | genotype 66                                  | 35      | Salt Creek                         |
| 36        | genotype 148                            | 36        | genotype 166                              | 36        | genotype 70                                  | 36      | Schwarzmann                        |
| 37        | genotype 152                            | 37        | genotype 20                               | 37        | genotype 87                                  | 37      | <i>Vitis novae-angliae</i> Fernald |
| 38        | genotype 156                            | 38        | genotype 23                               | 38        | genotype 88                                  | 38      | genotype 03                        |
| 39        | genotype 18                             | 39        | genotype 24                               | 39        | genotype 89                                  | 39      | genotype 07                        |
| 40        | genotype 22                             | 40        | genotype 39                               | 40        | genotype 92                                  | 40      | genotype 101                       |
| 41        | genotype 30                             | 41        | genotype 71                               | 41        | genotype 98                                  | 41      | genotype 103                       |
| 42        | genotype 33                             | 42        | genotype 74                               | 42        | genotype 99                                  | 42      | genotype 105                       |
| 43        | genotype 36                             | 43        | genotype 75                               |           |                                              | 43      | genotype 106                       |

**Supplemental Data for:**

Migliaro D, De Lorenzis G, Di Lorenzo GS, De Nardi B, Gardiman M, Failla O, Brancadoro L and Crespan M. 2019.

Grapevine non-*vinifera* genetic diversity assessed by simple sequence repeat markers as a starting point for new rootstock breeding programs.

Am J Enol Vitic 70:390-397. doi: 10.5344/ajev.2019.18054.

---

---

**Supplemental Table 5 (continued)** Genotypes subdivision depending on cluster membership (Q > 85%) and admixed (Q < 0.85) according to structure. Genotypes are in alphabetical order.

| <b>Cluster 1</b> | <b>Cluster 2</b> | <b>Cluster 3</b> | <b>Admixed</b>  |
|------------------|------------------|------------------|-----------------|
| 44 genotype 41   | 44 genotype 76   |                  | 44 genotype 108 |
| 45 genotype 42   | 45 genotype 80   |                  | 45 genotype 110 |
| 46 genotype 43   | 46 genotype 83   |                  | 46 genotype 111 |
| 47 genotype 46   |                  |                  | 47 genotype 115 |
| 48 genotype 49   |                  |                  | 48 genotype 119 |
| 49 genotype 55   |                  |                  | 49 genotype 13  |
| 50 genotype 57   |                  |                  | 50 genotype 135 |
| 51 genotype 62   |                  |                  | 51 genotype 145 |
| 52 genotype 64   |                  |                  | 52 genotype 15  |
| 53 genotype 65   |                  |                  | 53 genotype 155 |
| 54 genotype 68   |                  |                  | 54 genotype 157 |
| 55 genotype 78   |                  |                  | 55 genotype 158 |
| 56 genotype 90   |                  |                  | 56 genotype 165 |
| 57 genotype 91   |                  |                  | 57 genotype 17  |
| 58 genotype 95   |                  |                  | 58 genotype 19  |
| 59 genotype 96   |                  |                  | 59 genotype 21  |
|                  |                  |                  | 60 genotype 25  |
|                  |                  |                  | 61 genotype 26  |
|                  |                  |                  | 62 genotype 27  |
|                  |                  |                  | 63 genotype 29  |
|                  |                  |                  | 64 genotype 31  |
|                  |                  |                  | 65 genotype 32  |
|                  |                  |                  | 66 genotype 34  |
|                  |                  |                  | 67 genotype 35  |
|                  |                  |                  | 68 genotype 37  |
|                  |                  |                  | 69 genotype 40  |
|                  |                  |                  | 70 genotype 44  |
|                  |                  |                  | 71 genotype 45  |
|                  |                  |                  | 72 genotype 53  |
|                  |                  |                  | 73 genotype 56  |
|                  |                  |                  | 74 genotype 58  |
|                  |                  |                  | 75 genotype 60  |
|                  |                  |                  | 76 genotype 63  |
|                  |                  |                  | 77 genotype 69  |
|                  |                  |                  | 78 genotype 72  |
|                  |                  |                  | 79 genotype 73  |
|                  |                  |                  | 80 genotype 77  |
|                  |                  |                  | 81 genotype 79  |
|                  |                  |                  | 82 genotype 81  |
|                  |                  |                  | 83 genotype 82  |
|                  |                  |                  | 84 genotype 86  |
|                  |                  |                  | 85 genotype 97  |

---
